# Supplementary material for: Identification of Common Liver Metabolites of the Natural Bioactive Compound Erinacine A, Purified from Hericium erinaceus Mycelium
Source: MDPI journal article supplement (doi:10.3390/app12031201), 2022-01-24
Supplement: s1 [file s1]

Supporting Information

# Common Liver Metabolites Identification of Natural Bioactive Compound Erinacine A, Purified from *Hericium erinaceus* Mycelium

Yu-Hsuan Kuo<sup>1</sup>, Ting-Wei Lin<sup>1</sup>, Jing-Yi Lin<sup>1</sup>, Yu-Wen-Chen<sup>1</sup>, Tsung-Ju Li<sup>1\*</sup>, Chin-Chu Chen<sup>1-4\*</sup>

<sup>1</sup> Biotech Research Institute, Grape King Bio., Taoyuan 32542, Taiwan

<sup>2</sup> Department of Food Science, Nutrition, and Nutraceutical Biotechnology, Shih Chien University, Taipei City 11031, Taiwan

<sup>3</sup> Bioscience Technology, Chung Yuan Christian University, Taoyuan 320314, Taiwan

<sup>4</sup> Institute of Food Science and Technology, National Taiwan University, Taipei City 10617, Taiwan

\* Correspondence: [tsungju.liu@grapeking.com.tw](mailto:tsungju.liu@grapeking.com.tw) (T.-J.L); [drccchen@g2.usc.edu.tw](mailto:drccchen@g2.usc.edu.tw) (C.-C.C.)

Table S1. Identify of erinacine A metabolites in rat and human liver S9 with an UPLC-QTOF/MS.

| ID     | Metabolic reaction                     | Formula                                                          | RT     | Exact mass | Mass error(ppm) | Accurate mass | Fragment                                                                              | Polarity | Rat | Human |
|--------|----------------------------------------|------------------------------------------------------------------|--------|------------|-----------------|---------------|---------------------------------------------------------------------------------------|----------|-----|-------|
| Parent | Erinacine A                            | C <sub>25</sub> H <sub>36</sub> O <sub>6</sub>                   | 8.782  | 432.2515   | 0.73            | 432.2512      | 119.0859, 199.1492, 240.1464, 283.2055, 301.2162*                                     | Positive | v   | v     |
| M1*    | Alcohols Dehydration                   | C <sub>25</sub> H <sub>34</sub> O <sub>5</sub>                   | 8.799  | 414.2399   | -1.63           | 414.2406      | 69.0327, 105.0709, 119.0856*, 135.0817, 181.1249, 235.1701, 283.2036                  | Positive | v   | v     |
| M2*    | Demethylation                          | C <sub>24</sub> H <sub>34</sub> O <sub>6</sub>                   | 4.916  | 418.2354   | -0.25           | 418.2355      | 97.0289, 123.0551*, 179.0486, 231.0436, 368.9803                                      | Positive | v   | v     |
| M3*    | Demethylation + Hydrogenation          | C <sub>24</sub> H <sub>36</sub> O <sub>6</sub>                   | 13.28  | 420.2488   | -4.72           | 420.2512      | 55.0539, 77.0054*, 95.0854, 147.1172, 277.2183, 353.2141                              | Positive | v   | v     |
| M4*    | 2x Hydroxylation                       | C <sub>25</sub> H <sub>36</sub> O <sub>8</sub>                   | 4.071  | 464.2405   | -1.41           | 464.241       | 89.0597*, 133.0860, 177.1115, 297.1842                                                | Positive | v   | v     |
| M5*    | Demethylation and two Hydroxylations   | C <sub>24</sub> H <sub>34</sub> O <sub>8</sub>                   | 8.777  | 450.2265   | 2.44            | 450.2254      | 59.0601*, 101.0705, 178.1225, 321.1516                                                | Positive | v   | v     |
| M6     | Gluthation conjugation + Demethylation | C <sub>34</sub> H <sub>49</sub> N <sub>3</sub> O <sub>12</sub> S | 12.213 | 723.303    | -0.92           | 723.3037      | 59.0487*, 133.0856, 211.1383, 459.2802                                                | Positive | v   |       |
| M7     | Ethyl Ether to Acid                    | C <sub>23</sub> H <sub>30</sub> O <sub>7</sub>                   | 3.383  | 418.1998   | 1.55            | 418.1992      | 136.0615, 161.0463, 169.0982, 188.0338, 348.0094, 381.1361                            | Positive | v   |       |
| M8     | Gluthation Conjugation + Hydroxylation | C <sub>35</sub> H <sub>51</sub> N <sub>3</sub> O <sub>13</sub> S | 11.158 | 753.314    | -0.39           | 753.3143      | 59.0489*, 73.0648, 89.0596, 99.0803, 117.0909, 221.1387, 265.1651, 397.2426, 502.3237 | Positive | v   |       |
| M9     | Hydroxylation and Methylation          | C <sub>26</sub> H <sub>38</sub> O <sub>7</sub>                   | 16.296 | 462.2605   | -2.68           | 462.2618      | 81.0695, 105.0691, 132.0012, 148.0881, 185.0403, 240.1748*, 284.2353, 329.9974        | Positive | v   |       |

|     |                                                   |                                                 |        |          |       |          |                                                                                                                                                                                                                                                                                                                                                                                                                                                                                                                                                                                                                                                                                               |            |
|-----|---------------------------------------------------|-------------------------------------------------|--------|----------|-------|----------|-----------------------------------------------------------------------------------------------------------------------------------------------------------------------------------------------------------------------------------------------------------------------------------------------------------------------------------------------------------------------------------------------------------------------------------------------------------------------------------------------------------------------------------------------------------------------------------------------------------------------------------------------------------------------------------------------|------------|
| M10 | Alcohols<br>Dehydration                           | C <sub>25</sub> H <sub>34</sub> O <sub>5</sub>  | 9.227  | 414.2399 | -1.8  | 414.2406 | 69.0327, 105.0709,<br>119.0856*,<br>138.0817, 181.1249,<br>235.1701, 283.2036<br>67.0539, 91.0535,<br>119.0852*,<br>130.0782, 149.0073,<br>188.1020, 209.0453,<br>264.0988, 324.1374,<br>367.0251<br>73.0284, 115.0389,<br>149.0960, 183.1165,<br>227.1430, 271.1691,<br>313.1797*<br>112.9368,<br>255.2009*,<br>299.2018, 355.2285<br>89.0611, 103.0768,<br>157.1003*,<br>262.8575<br>61.9885, 77.0065*,<br>163.1142, 337.2168<br>127.0724*,<br>177.1117, 268.1284,<br>387.1819<br>171.0843, 203.9762,<br>212.1586, 250.9992,<br>283.2429*,<br>396.1933, 463.0576<br>59.0135*, 89.0238,<br>194.0152<br>57.0696*, 149.0243,<br>302.186, 376.2594<br>57.0699, 164.9294*,<br>226.2190, 279.1032 | Positive v |
| M11 | Deethylation                                      | C <sub>23</sub> H <sub>32</sub> O <sub>6</sub>  | 15.427 | 404.2194 | -1.32 | 404.2199 | 130.0782, 149.0073,<br>188.1020, 209.0453,<br>264.0988, 324.1374,<br>367.0251<br>73.0284, 115.0389,<br>149.0960, 183.1165,<br>227.1430, 271.1691,<br>313.1797*<br>112.9368,<br>255.2009*,<br>299.2018, 355.2285<br>89.0611, 103.0768,<br>157.1003*,<br>262.8575<br>61.9885, 77.0065*,<br>163.1142, 337.2168<br>127.0724*,<br>177.1117, 268.1284,<br>387.1819<br>171.0843, 203.9762,<br>212.1586, 250.9992,<br>283.2429*,<br>396.1933, 463.0576<br>59.0135*, 89.0238,<br>194.0152<br>57.0696*, 149.0243,<br>302.186, 376.2594<br>57.0699, 164.9294*,<br>226.2190, 279.1032                                                                                                                     | Positive v |
| M12 | Oxidation + 2x<br>Desaturation                    | C <sub>25</sub> H <sub>32</sub> O <sub>7</sub>  | 4.89   | 444.2142 | -1.41 | 444.2148 | 149.0960, 183.1165,<br>227.1430, 271.1691,<br>313.1797*<br>112.9368,<br>255.2009*,<br>299.2018, 355.2285<br>89.0611, 103.0768,<br>157.1003*,<br>262.8575<br>61.9885, 77.0065*,<br>163.1142, 337.2168<br>127.0724*,<br>177.1117, 268.1284,<br>387.1819<br>171.0843, 203.9762,<br>212.1586, 250.9992,<br>283.2429*,<br>396.1933, 463.0576<br>59.0135*, 89.0238,<br>194.0152<br>57.0696*, 149.0243,<br>302.186, 376.2594<br>57.0699, 164.9294*,<br>226.2190, 279.1032                                                                                                                                                                                                                            | Positive v |
| M13 | Hydration,<br>Hydrolysis<br>(Internal)            | C <sub>25</sub> H <sub>38</sub> O <sub>7</sub>  | 8.453  | 450.2616 | -0.35 | 450.2618 | 255.2009*,<br>299.2018, 355.2285<br>89.0611, 103.0768,<br>157.1003*,<br>262.8575<br>61.9885, 77.0065*,<br>163.1142, 337.2168<br>127.0724*,<br>177.1117, 268.1284,<br>387.1819<br>171.0843, 203.9762,<br>212.1586, 250.9992,<br>283.2429*,<br>396.1933, 463.0576<br>59.0135*, 89.0238,<br>194.0152<br>57.0696*, 149.0243,<br>302.186, 376.2594<br>57.0699, 164.9294*,<br>226.2190, 279.1032                                                                                                                                                                                                                                                                                                    | Negative   |
| M14 | Alkenes to<br>Dihydrodiol                         | C <sub>25</sub> H <sub>38</sub> O <sub>8</sub>  | 5.837  | 466.2566 | -0.18 | 466.2567 | 157.1003*,<br>262.8575<br>61.9885, 77.0065*,<br>163.1142, 337.2168<br>127.0724*,<br>177.1117, 268.1284,<br>387.1819<br>171.0843, 203.9762,<br>212.1586, 250.9992,<br>283.2429*,<br>396.1933, 463.0576<br>59.0135*, 89.0238,<br>194.0152<br>57.0696*, 149.0243,<br>302.186, 376.2594<br>57.0699, 164.9294*,<br>226.2190, 279.1032                                                                                                                                                                                                                                                                                                                                                              | Positive   |
| M15 | Demethylation +<br>Dehydrogenation                | C <sub>24</sub> H <sub>32</sub> O <sub>6</sub>  | 12.815 | 416.2204 | 1.32  | 416.2199 | 61.9885, 77.0065*,<br>163.1142, 337.2168<br>127.0724*,<br>177.1117, 268.1284,<br>387.1819<br>171.0843, 203.9762,<br>212.1586, 250.9992,<br>283.2429*,<br>396.1933, 463.0576<br>59.0135*, 89.0238,<br>194.0152<br>57.0696*, 149.0243,<br>302.186, 376.2594<br>57.0699, 164.9294*,<br>226.2190, 279.1032                                                                                                                                                                                                                                                                                                                                                                                        | Positive   |
| M16 | Acetylation +<br>Oxidation                        | C <sub>27</sub> H <sub>38</sub> O <sub>8</sub>  | 7.546  | 490.2563 | -0.76 | 490.2567 | 177.1117, 268.1284,<br>387.1819<br>171.0843, 203.9762,<br>212.1586, 250.9992,<br>283.2429*,<br>396.1933, 463.0576<br>59.0135*, 89.0238,<br>194.0152<br>57.0696*, 149.0243,<br>302.186, 376.2594<br>57.0699, 164.9294*,<br>226.2190, 279.1032                                                                                                                                                                                                                                                                                                                                                                                                                                                  | Positive v |
| M17 | Demethylation +<br>Oxidation +<br>Glucuronidation | C <sub>30</sub> H <sub>42</sub> O <sub>13</sub> | 9.173  | 610.2609 | -2.72 | 610.2625 | 171.0843, 203.9762,<br>212.1586, 250.9992,<br>283.2429*,<br>396.1933, 463.0576<br>59.0135*, 89.0238,<br>194.0152<br>57.0696*, 149.0243,<br>302.186, 376.2594<br>57.0699, 164.9294*,<br>226.2190, 279.1032                                                                                                                                                                                                                                                                                                                                                                                                                                                                                     | Negative v |
| M18 | Demethylation and<br>Hydroxylation                | C <sub>24</sub> H <sub>34</sub> O <sub>7</sub>  | 5.496  | 434.2291 | -3.16 | 434.2305 | 59.0135*, 89.0238,<br>194.0152<br>57.0696*, 149.0243,<br>302.186, 376.2594<br>57.0699, 164.9294*,<br>226.2190, 279.1032                                                                                                                                                                                                                                                                                                                                                                                                                                                                                                                                                                       | Negative v |
| M19 | Decarbonylation                                   | C <sub>24</sub> H <sub>36</sub> O <sub>4</sub>  | 11.341 | 404.2545 | -4.51 | 404.2563 | 57.0696*, 149.0243,<br>302.186, 376.2594<br>57.0699, 164.9294*,<br>226.2190, 279.1032                                                                                                                                                                                                                                                                                                                                                                                                                                                                                                                                                                                                         | Positive   |
| M20 | Hetero oxide<br>reduction +<br>Hydrogenation      | C <sub>25</sub> H <sub>38</sub> O <sub>5</sub>  | 15.416 | 418.2717 | -0.42 | 418.2719 | 57.0699, 164.9294*,<br>226.2190, 279.1032                                                                                                                                                                                                                                                                                                                                                                                                                                                                                                                                                                                                                                                     | Positive   |

|     |                              |                                                                  |        |          |       |          |                                                                          |
|-----|------------------------------|------------------------------------------------------------------|--------|----------|-------|----------|--------------------------------------------------------------------------|
| M21 | Decarboxylation              | C <sub>24</sub> H <sub>36</sub> O <sub>4</sub>                   | 14.928 | 388.2608 | -1.48 | 388.2614 | 89.0597*, 133.0862,<br>211.1443, 279.1310, Positive<br>328.2057          |
| M22 | Hydroxymethylene<br>Loss     | C <sub>24</sub> H <sub>34</sub> O <sub>5</sub>                   | 3.312  | 402.2416 | 2.49  | 402.2406 | 55.0537, 72.0807*,<br>120.0800, 188.0722, Positive<br>227.1433, 260.1524 |
| M23 | Hydrolysis + 2x<br>Oxidation | C <sub>24</sub> H <sub>36</sub> O <sub>4</sub>                   | 3.282  | 482.2529 | 2.67  | 482.2516 | 72.0814, 86.0962*,<br>155.0828, 345.1186 Positive<br>84.0807*,           |
| M24 | Isopropyl<br>Dealkylation    | C <sub>35</sub> H <sub>53</sub> N <sub>3</sub> O <sub>12</sub> S | 2.62   | 390.204  | -0.6  | 390.2042 | 172.1137 ,257.1384, Positive<br>302.1868                                 |

---

\*Common liver metabolites of erinacine A detected in Rat and Human Liver S9.
